# Supplementary material
Source: publisher figshare collection journal article supplement (https://acs.figshare.com/ndownloader/files/3999121)

## Supporting Information

Single electrode genosensor for simultaneous determination of sequences encoding hemagglutinin and neuraminidase of Avian Influenza Virus (AIV) type H5N1

*Iwona Grabowska<sup>1</sup>, Kamila Malecka<sup>1</sup>, Anna Stachyra<sup>2</sup>, Anna Góra - Sochacka<sup>2</sup>, Agnieszka Sirko<sup>2</sup>, Włodzimierz Zagórski-Ostoj<sup>2</sup>, Hanna Radecka<sup>1</sup>, Jerzy Radecki<sup>1\*</sup>*

<sup>1</sup> Institute of Animal Reproduction and Food Research, Polish Academy of Sciences, Tuwima 10, 10-747 Olsztyn, Poland

<sup>2</sup> Institute of Biochemistry and Biophysics, Polish Academy of Sciences, Pawińskiego 5A, 02-106 Warsaw, Poland

\*Corresponding authors: Phone: +48895234612, Fax: +48895240124. E-mail: j.radecki@pan.olsztyn.pl

## Figure S-1

The calculation of energy of ssDNA-Fc- ssDNA-Fc dimer formation in solution.

Oligo sequence: ATTTGGAGCTATAGCAGGTT

Number of bases : 20

Description: ferrocene

### Properties of Anti-sense Primer:

|                |          |
|----------------|----------|
| Rating         | 76       |
| Molecular Wt   | 6,187.11 |
| T <sub>m</sub> | 51.41 °C |
| GC%            | 40       |
| nmol/A260      | 5.02     |

|                  |                 |
|------------------|-----------------|
| μg/A260          | 31.06           |
| ΔG               | -31.84 kcal/mol |
| 3' end Stability | -7.95 kcal/mol  |
| ΔH               | -155.6 kcal/mol |
| ΔS               | -0.42 kcal/mol  |
| 5' end Stability | -7.32 kcal/mol  |

### Secondary structures of anti-sense primer:

#### Hairpins:

Hairpins not found

#### Dimers:

1. ΔG = -12.87 kcal/mol

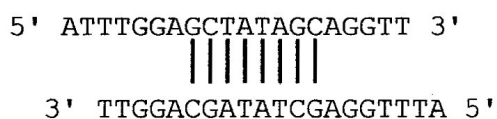

2. ΔG = -6.34 kcal/mol

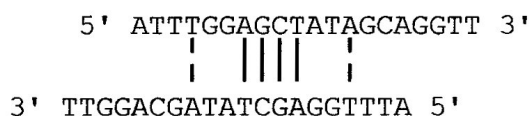

The calculation of energy of ssDNA-MB-ssDNA-MB dimer formation in solution.

**Number of bases : 20**

**Description:** methylene blue

|                       |          |
|-----------------------|----------|
| Rating                | 83       |
| Molecular Wt          | 6,199.13 |
| T <sub>m</sub>        | 51.87 °C |
| GC%                   | 45       |
| nmol/A <sub>260</sub> | 4.78     |

|                              |                 |
|------------------------------|-----------------|
| $\mu\text{g}/\text{A}_{260}$ | 29.63           |
| $\Delta G$                   | -30.31 kcal/mol |
| 3' end Stability             | -6.47 kcal/mol  |
| $\Delta H$                   | -140.8 kcal/mol |
| $\Delta S$                   | -0.37 kcal/mol  |
| 5' end Stability             | -8.44 kcal/mol  |

### Hairpins:

┌ ACTGTCAGGGTAA 5'  
 A │ │ │ │ │  
 └ AGACAG 3'

1.  $\Delta G = -7.47 \text{ kcal/mol}$  (3' Dimer)

5' AATGGGACTGTCAAAGACAG 3'  
||||| |||||  
3' GACAGAAACTGTCAGGGTAA 5'

### Figure S-3

Representative Osteryoung Square Wave voltammograms recorded with electrode modified with SH-ssDNA-Fc and SH-ssDNA-MB probe –black line and after hybridization (30 minutes) with:

- (1) 1  $\mu\text{M}$  of target oligonucleotide complementary to SH- ssDNA- Fc – red line
- (2) 1  $\mu\text{M}$  target oligonucleotide complementary to SH-ssDNA-MB – blue line

Measuring conditions: in 0.1 M  $\text{NaClO}_4$  and 2.5 mM  $\text{Na}_2\text{HPO}_4$ , pH 7.0; frequency: 100 Hz; step potential: 0.105 V/s; amplitude: 0.025 V.

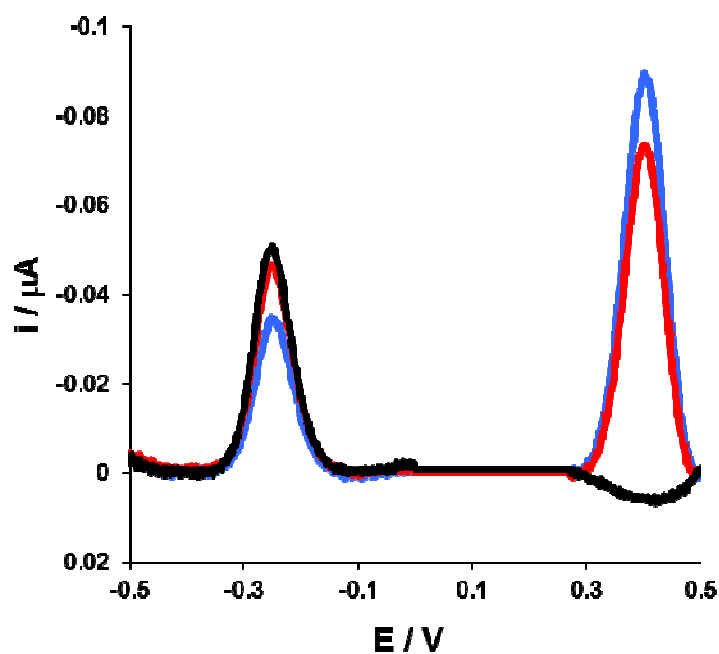

#### Figure S-4

Representative Osteryoung Square Wave voltammograms recorded with electrode modified with SH-ssDNA-Fc and SH-ssDNA-MB probe –black line and after hybridization (30 minutes) with:

- (1) 1  $\mu\text{M}$  target oligonucleotide complementary to SH-ssDNA-MB – blue line
- (2) 1  $\mu\text{M}$  target oligonucleotide complementary to SH-ssDNA- Fc – red line

Measuring conditions: in 0.1 M  $\text{NaClO}_4$  and 2.5 mM  $\text{Na}_2\text{HPO}_4$ , pH 7.0; frequency: 100 Hz; step potential: 0.105 V/s; amplitude: 0.025 V.

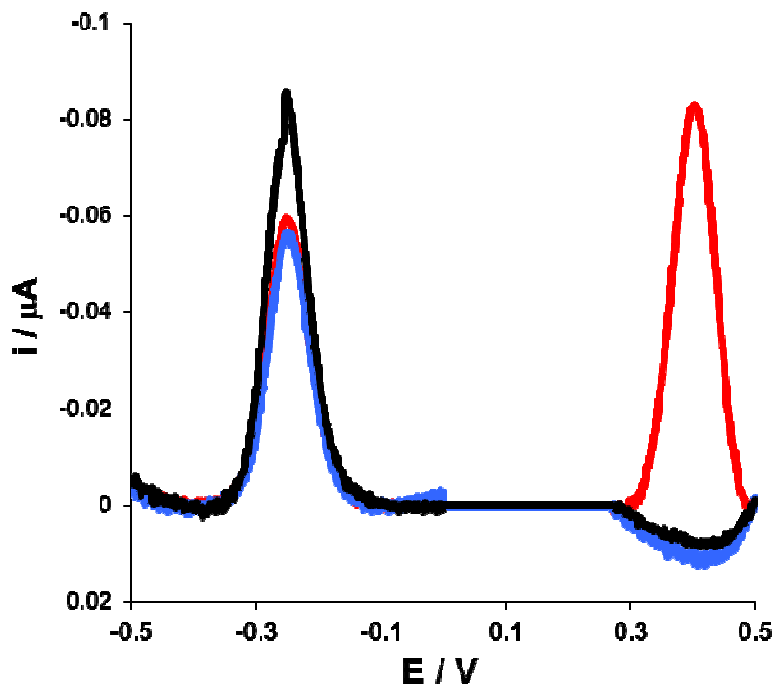

Supplement: Supplementary file 1 [file 3999121]
